# Supplementary material
Source: PubMed Central journal article supplement (PMC4475894)
Supplement: AEM.00463-15_zam999116354so1.pdf [file AEM.00463-15_zam999116354so1.pdf]

Table S1. Panel of 12 antibiotics using breakpoint agar dilution for *E. coli* obtained in 2002 – 2003 (Berge AC, Hancock DD, Sicho WM, Besser TE. Geographic, farm, and animal factors associated with multiple antimicrobial resistance in fecal *Escherichia coli* isolates from cattle in the western United States. *J Am Vet Med Assoc.* 2010 Jun 15;236(12):1338-44.)

| Antimicrobial                     | Breakpoint concentration<br>( $\mu\text{g/ml}$ ) |
|-----------------------------------|--------------------------------------------------|
| Amikacin                          | 32                                               |
| Amoxicillin/clavulanic acid       | 32/16                                            |
| Ampicillin                        | 16                                               |
| Cephalothin                       | 32                                               |
| Ceftiofur                         | 4                                                |
| Chloramphenicol                   | 16                                               |
| Gentamicin                        | 8                                                |
| Nalidixic acid                    | 32                                               |
| Streptomycin                      | 12                                               |
| Sulfisoxazole                     | 100                                              |
| Tetracycline                      | 8                                                |
| Sulfamethoxazole/<br>trimethoprim | 76/4                                             |

Table S2. Panel of antibiotics tested in the 2008 study by agar diffusion.

| Antimicrobial               | ( $\mu\text{g}/\text{disk}$ ) | Zone size breakpoint for<br>resistance<br>(mm) |
|-----------------------------|-------------------------------|------------------------------------------------|
| Amikacin                    | 30                            | d14                                            |
| Amoxicillin/clavulanic acid | 20/10                         | d13                                            |
| Ampicillin                  | 10                            | d13                                            |
| Cephalothin                 | 30                            | d14                                            |
| Ceftiofur                   | 30                            | d17                                            |
| Chloramphenicol             | 30                            | d12                                            |
| Gentamicin                  | 10                            | d12                                            |
| Nalidixic acid              | 30                            | d13                                            |
| Streptomycin                | 10                            | d11                                            |
| Sulfisoxazole               | 250                           | d12                                            |
| Tetracycline                | 30                            | d14                                            |
| Trimethoprim                | 1.25/23.75                    | d10                                            |
| /Sulfamethoxazole           |                               |                                                |

Table S3. Summary of the number of samples collected from 30 dairy farms.

| Type of sample                | Total | Average  |        |     |     |
|-------------------------------|-------|----------|--------|-----|-----|
|                               |       | per farm | Median | Min | Max |
| <u>Fecal</u>                  |       |          |        |     |     |
| Calf <sup>a</sup>             | 1,173 | 39.1     | 43     | 11  | 46  |
| Fresh cows <sup>b</sup>       | 31    | 1.0      | 1      | 0   | 2   |
| Hospital pens <sup>b</sup>    | 28    | 0.9      | 1      | 0   | 2   |
| Other adult cows <sup>b</sup> | 60    | 2.0      | 2      | 0   | 6   |
| <u>Environmental</u>          |       |          |        |     |     |
| Lagoon <sup>c</sup>           | 31    | 1.0      | 1      | 1   | 2   |
| Milk filter <sup>c</sup>      | 28    | 0.9      | 1      | 0   | 1   |
| Total                         | 1351  | 45.0     | 48     | 15  | 52  |

Table S4. Number of samples per type of selective media and number of *E. coli* isolates confirmed by *iudA* PCR tested for *bla*<sub>CMY-2</sub> and/or *bla*<sub>CTX-M</sub> for each type of media.

|                                                                    | Cefepime<br>(4 µg/ml) | Cefoxitin<br>(4 µg/ml) | Plain<br>MacConkey |
|--------------------------------------------------------------------|-----------------------|------------------------|--------------------|
| Number of samples plated                                           | 1,347                 | 1,347                  | 796                |
| Number of isolates from samples                                    | 2,785                 | 3,913                  | 1,847              |
| Number of isolates positive/tested for <i>bla</i> <sub>CTX-M</sub> | 2,508/2,785           | 8/318                  | 26/585             |
| Number of isolates positive/tested for <i>bla</i> <sub>CMY-2</sub> | 380/2,785             | 3,080/3,912            | 189/591            |

Table S5. Number (percent) of 3,687 *E. coli* isolates that were tested for both *bla*<sub>CMY-2</sub> and *bla*<sub>CTX-M</sub> by PCR.

| Media                            | <i>bla</i> <sub>CTX-M</sub> <sup>+</sup> , | <i>bla</i> <sub>CTX-M</sub> <sup>-</sup> , | <i>bla</i> <sub>CMY-2</sub> <sup>+</sup> , | <i>bla</i> <sub>CMY-2</sub> <sup>-</sup> , | Total |
|----------------------------------|--------------------------------------------|--------------------------------------------|--------------------------------------------|--------------------------------------------|-------|
|                                  | <i>bla</i> <sub>CMY-2</sub> <sup>+</sup>   | <i>bla</i> <sub>CMY-2</sub> <sup>+</sup>   | <i>bla</i> <sub>CMY-2</sub> <sup>-</sup>   | <i>bla</i> <sub>CMY-2</sub> <sup>-</sup>   |       |
| Cefepime (4 µg/ml) <sup>a</sup>  | 339 (12.2)                                 | 41 (1.5)                                   | 2,169 (77.9)                               | 236 (8.5)                                  | 2,785 |
| Cefoxitin (4 µg/ml) <sup>a</sup> | 2 (0.05)                                   | 235 (74.1)                                 | 6 (1.9)                                    | 74 (23.3)                                  | 317   |
| Plain MacConkey                  | 3 (0.5)                                    | 185 (31.6)                                 | 23 (3.9)                                   | 374 (63.9)                                 | 585   |

<sup>a</sup> Antibiotic supplement to MacConkey after overnight growth in cefotaxime-supplemented LB broth (2 µg/ml).

Figure S1. Dairy herd size by region of Washington State.

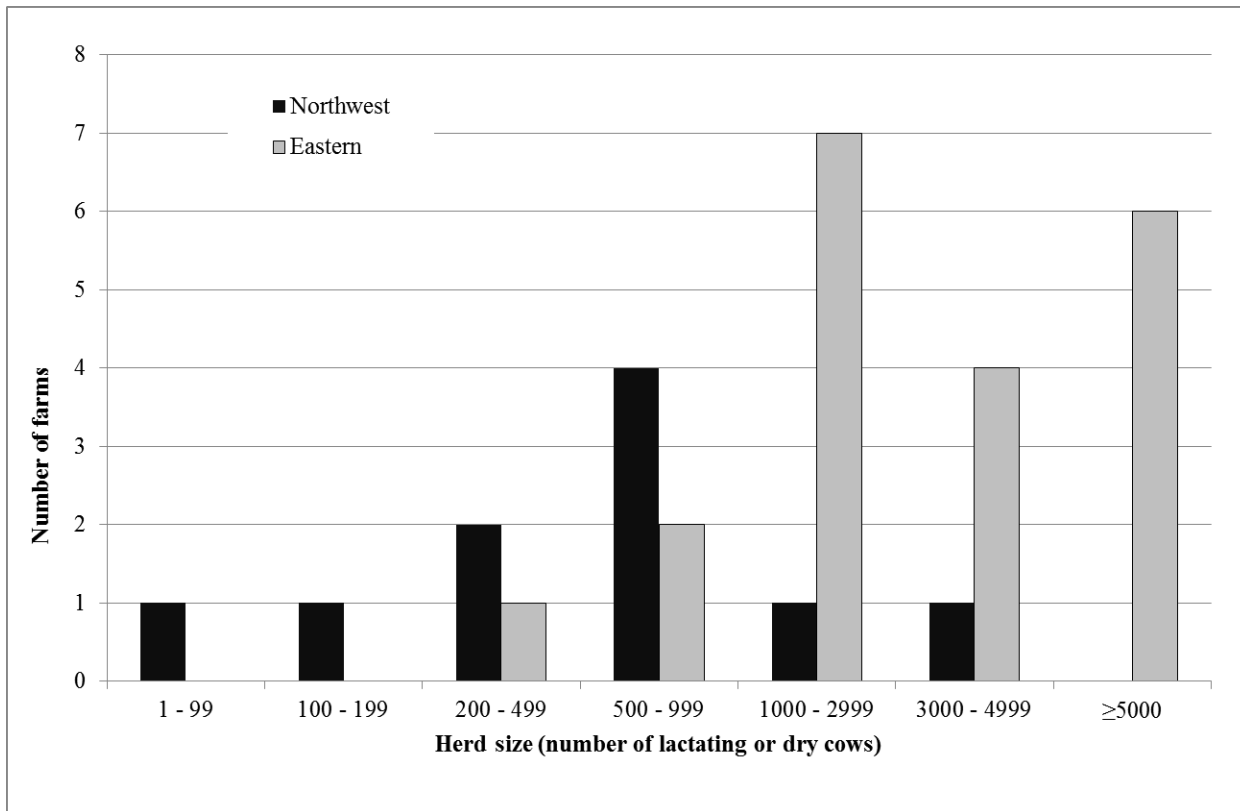

Figure S2. Prevalence of *E.coli* carrying *bla*<sub>CMY-2</sub> compared to prevalence of CTX-M EC in dairy calves by calf age. Wilcoxon signed rank test for the difference between calf age prevalence *P*-value = 0.002. Error bars represent +/- the standard error of the mean.

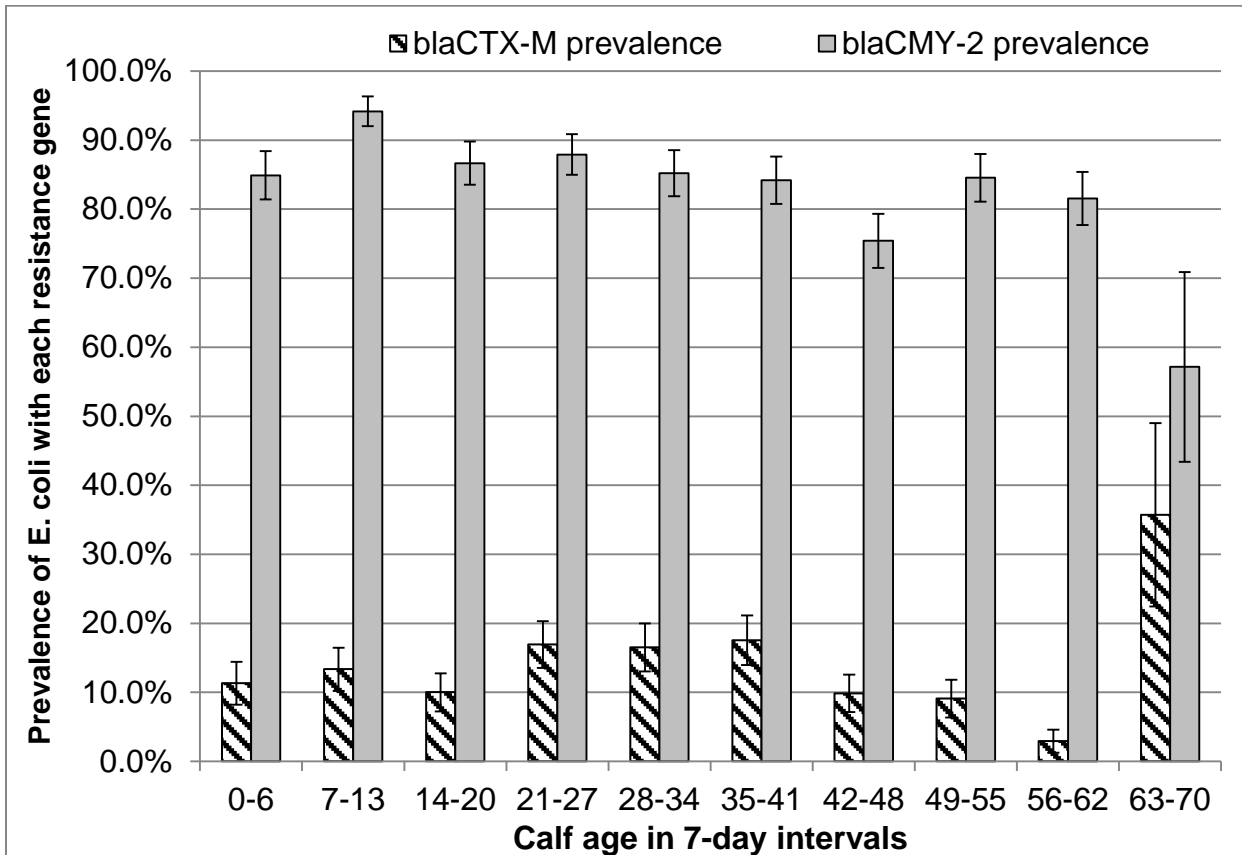

**APPENDIX:**

**2012 SURVEY OF  
WASHINGTON DAIRY FARM OPERATIONS:  
MOVEMENT OF ANTIBIOTIC RESISTANT  
BACTERIA BETWEEN ANIMALS AND FARMS**

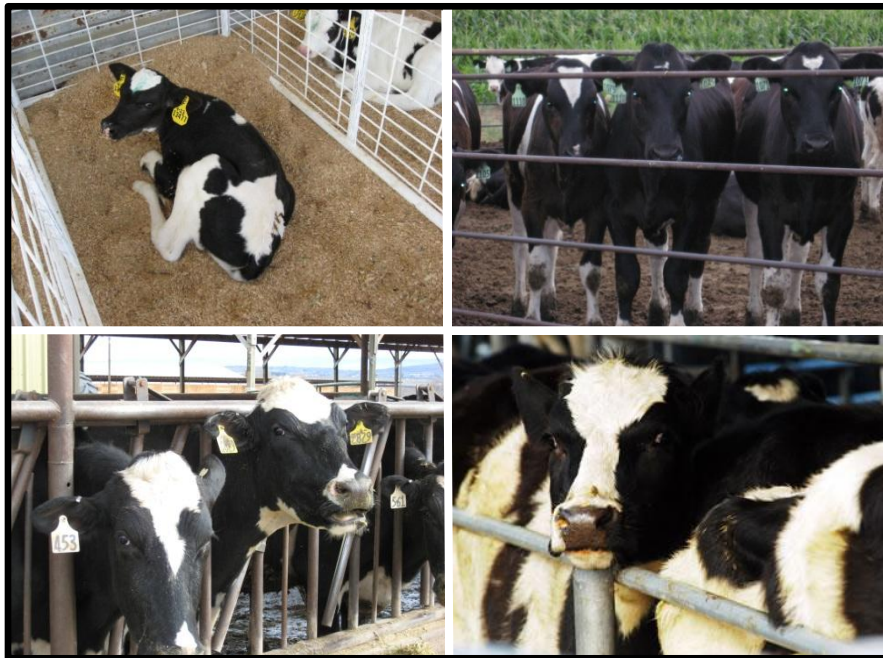

This is a collaborative effort among practicing veterinarians, animal agricultural industries, the School for Global Animal Health and the Department of Veterinary Clinical Sciences Washington State University



## DAIRY BACKGROUND AND ANIMAL MOVEMENT

1. **Which one category best describes the current dairy herd size for this operation? Please include both milking and dry cows.**

*(Please check the ONE box that matches your answer)*

- <sub>1</sub> None
- <sub>2</sub> 1 - 99 cows
- <sub>3</sub> 100 - 199 cows
- <sub>4</sub> 200 - 499 cows
- <sub>5</sub> 500 - 999 cows
- <sub>6</sub> 1000 -3000 cows
- <sub>7</sub> 3000 -5000 cows
- <sub>8</sub> Over 5000 cows

2. **Which one category best describes the current maximum number of pre-weaned calves on your operation in the last 12 months?**

*(Please check the ONE box that matches your answer)*

- <sub>2</sub> 1 - 19 calves
- <sub>3</sub> 20 - 39 calves
- <sub>4</sub> 40 - 64 calves
- <sub>5</sub> 65 - 199 calves
- <sub>6</sub> 200 - 499 calves
- <sub>7</sub> 500 - 999 calves
- <sub>8</sub> More than 1000 calves

3. **Do you raise bull calves on premises?**

- <sub>1</sub> No
- <sub>2</sub> Yes

4. **Which one category best describes the maximum number of heifers (4 to 24 months of age) on your operation in the last 12 months?**

*(Please check the ONE box that matches your answer)*

- <sub>1</sub> None
- <sub>2</sub> 1 - 99 heifers
- <sub>3</sub> 100 - 199 heifers
- <sub>4</sub> 200 - 499 heifers
- <sub>5</sub> 500 - 999 heifers
- <sub>6</sub> 1000 - 3000 heifers
- <sub>7</sub> 3000 - 5000 heifers
- <sub>8</sub> Over 5000 heifers

5. Does this dairy operation have more than one physical location?

- <sub>1</sub> No
- <sub>2</sub> Yes 

6. How many physical locations does this operation have for accommodating this number of dairy cows or herd size?

\_\_\_\_\_ Number of physical locations

7. Have you sent any heifer calves off premises within the last 12 months?

- <sub>1</sub> No
- <sub>2</sub> Yes 

8. If yes, where do/did you send your heifer calves?

- <sub>1</sub> Commercial heifer raiser
- <sub>2</sub> Other dairy location
- <sub>3</sub> Other, explain \_\_\_\_\_

9. Have you purchased lactating cows in the past 6 months?

- <sub>1</sub> No
- <sub>2</sub> Yes  How many \_\_\_\_\_

10. Have you purchased replacement heifers (age 60 days to about 2 years) in the past 6 months?

- <sub>1</sub> No
- <sub>2</sub> Yes  How many \_\_\_\_\_

11. Have you purchased calves (age 0 to 60 days) in the past 6 months?

- <sub>1</sub> No
- <sub>2</sub> Yes  How many \_\_\_\_\_

12. Have you purchased bulls in the past 6 months?

- <sub>1</sub> No
- <sub>2</sub> Yes  How many \_\_\_\_\_

13. Do you send your heifer's off-farm to be bred?

- <sub>1</sub> Yes
  - <sub>2</sub> No
- 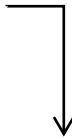

14. If yes, do other dairies use the same heifer breeder/premises?

- <sub>1</sub> Yes
- <sub>2</sub> No

15. What percentages of feeds does this dairy grow that are fed to cows on this dairy?

(check the best one for each feed category)

- <sub>1</sub> Less than 25 %
- <sub>2</sub> 26 - 50%
- <sub>3</sub> 51 - 75%
- <sub>4</sub> Greater than 75%
- <sub>5</sub> None

|                  | Corn | Hay | Other |
|------------------|------|-----|-------|
| Less than 25 %   |      |     |       |
| 26 - 50%         |      |     |       |
| 51 - 75%         |      |     |       |
| Greater than 75% |      |     |       |
| None             |      |     |       |

Please list 'Other' feed types: \_\_\_\_\_

## CALVING PEN PRACTICES

16. Where are close-ups cows kept prior to calving?

- <sub>1</sub> Dry lot
- <sub>2</sub> Bedded pack
- <sub>3</sub> Individual calving pen/stall
- <sub>4</sub> Free stalls
- <sub>5</sub> Tie stall
- <sub>6</sub> Pasture
- <sub>7</sub> Other, explain \_\_\_\_\_

**17. Where do the cows calve?**

- <sub>1</sub> Dry lot
- <sub>2</sub> Bedding pack
- <sub>3</sub> Individual calving pen/stall
- <sub>4</sub> Free stalls
- <sub>5</sub> Tie stall
- <sub>6</sub> Pasture
- <sub>7</sub> Calving cows are housed in close up pen
- <sub>8</sub> Other, explain\_\_\_\_\_

**18. Are sick cows ever housed with cows that are calving?**

- <sub>1</sub> Yes
- <sub>2</sub> No

**19. When cleaning the pen where cows calve, what procedures do you perform?**

(Check all that apply)

- <sub>1</sub> Scraped
- <sub>2</sub> Add lime
- <sub>3</sub> Add new straw
- <sub>4</sub> Add new shaving
- <sub>5</sub> Add new composted manure
- <sub>6</sub> Add new sand
- <sub>7</sub> Vacuum
- <sub>8</sub> Other, explain\_\_\_\_\_

**20. How frequently is new bedding added to the calving/maternity area?**

(Check all that apply)

- <sub>1</sub> Twice a week
- <sub>2</sub> Bi-weekly
- <sub>3</sub> Weekly
- <sub>4</sub> Monthly
- <sub>5</sub> Other, explain\_\_\_\_\_

21. How soon are calves removed from calving area or removed from cow?

- <sub>1</sub> As soon as they are born
- <sub>2</sub> Within 30 minutes
- <sub>3</sub> Within 2 hours
- <sub>4</sub> Within 6 hours
- <sub>5</sub> Within 12 hours
- <sub>6</sub> Within 24 hours
- <sub>7</sub> Greater than 24 hours
- <sub>8</sub> Other, explain \_\_\_\_\_

## FEEDING PRACTICES

22. Do you feed colostrum to your calves during the first 24 hours?

(Please check the ONE box that best matches your regular practices)

- <sub>1</sub> No
- <sub>2</sub> Yes 

23. If yes, how much colostrum do your calves receive during the first 24 hours?

(Please check the ONE box that matches your answer)

- <sub>1</sub> Less than 2 quarts
- <sub>2</sub> 2 quarts to 4 quarts
- <sub>3</sub> More than 4 quarts
- <sub>4</sub> Do not receive colostrum
- <sub>5</sub> Don't Know

24. Do you feed milk from buckets or bottles?

- <sub>1</sub> Buckets
- <sub>2</sub> Bottles

25. **When feeding your calves what direction do you most commonly feed the calves?**

- <sub>1</sub> Youngest to oldest
- <sub>2</sub> Oldest to youngest
- <sub>3</sub> Both directions
- <sub>4</sub> Other, explain \_\_\_\_\_

26. **What do you feed your pre-weaned calves after the first 24 hours?**

(Please check all that apply)

- <sub>1</sub> Non- medicated milk replacer
  - <sub>2</sub> Medicated milk replacer
  - <sub>3</sub> Fresh cow milk
  - <sub>4</sub> Hospital milk
  - <sub>5</sub> Bulk tank milk
- 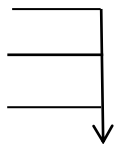

27. **Do you pasteurize the milk before feeding?**

- <sub>1</sub> No
- <sub>2</sub> Yes

28. **If you use medicated milk replacer or add ingredients to the milk or milk replacer, what products do you use most often?**

(Please check all that apply)

- <sub>1</sub> Decoquate (Deccox) - coccidiosis
- <sub>2</sub> Lasalocid (Bovatec) - coccidiosis
- <sub>6</sub> Other, explain \_\_\_\_\_

29. **What type of grain do you feed pre-weaned calves after the first 24 hours?**

(Please check all that apply)

- <sub>1</sub> Grain made on farm without antibiotic
- <sub>2</sub> Grain made on farm with antibiotic
- <sub>3</sub> Grain purchased without antibiotic
- <sub>4</sub> Grain purchased with antibiotic

30. **If antibiotics/antimicrobials (ionophores/coccidiosis) are in the grain, what is the name of the antibiotic/antimicrobials you use most often?**

- <sub>1</sub> Rumensin \_coccidiosis
- <sub>2</sub> Elanco -coccidiosis
- <sub>3</sub> Oxytetracycline
- <sub>4</sub> Other, explain \_\_\_\_\_

31. **How frequently do you clean the buckets/bottles that you feed milk in?**

- <sub>1</sub> Daily or more frequently
- <sub>2</sub> Every other day to weekly
- <sub>3</sub> Monthly
- <sub>4</sub> Between calves
- <sub>5</sub> Other, explain \_\_\_\_\_

32. **How are the buckets/bottles cleaned or disinfected?**

(Check all that apply)

- <sub>1</sub> Water
- <sub>2</sub> Soap and water
- <sub>3</sub> Disinfectant
- <sub>4</sub> Other, explain \_\_\_\_\_

33. **How frequently do you clean the buckets that you supply water in?**

- <sub>1</sub> Daily or more frequently
- <sub>2</sub> Every other day to weekly
- <sub>3</sub> Monthly
- <sub>4</sub> Between calves

34. **How do you clean or disinfect water buckets?**

(Check all that apply)

- <sub>1</sub> Water
- <sub>2</sub> Soap and water
- <sub>3</sub> Disinfectant
- <sub>4</sub> Other, explain \_\_\_\_\_

## CALF HOUSING PRACTICES

### 35. What type of calf hutch do you currently have on the dairy?

(Check all that apply)

- <sub>1</sub> Double individual wood style
- <sub>2</sub> Single individual wood style
- <sub>3</sub> Plastic hutch with run
- <sub>4</sub> Plastic enclosed
- <sub>4</sub> Plastic with tether
- <sub>4</sub> Triplet hutch wood style (California style hutch)
- <sub>4</sub> Other, explain \_\_\_\_\_

### 36. What type of calf hutch bedding do you currently have on the dairy?

(Check all that apply)

- <sub>1</sub> Shavings
- <sub>2</sub> Straw
- <sub>3</sub> Sand
- <sub>3</sub> None
- <sub>4</sub> Other, explain \_\_\_\_\_

### 37. How often is bedding added to the hutches?

- <sub>1</sub> Twice a week
- <sub>2</sub> Weekly
- <sub>3</sub> Monthly
- <sub>4</sub> Between calves
- <sub>5</sub> Other, explain \_\_\_\_\_

### 38. How often are the hutches cleaned?

- <sub>1</sub> Twice a week
- <sub>2</sub> Weekly
- <sub>3</sub> Monthly
- <sub>4</sub> Between calves
- <sub>5</sub> Other, explain \_\_\_\_\_



**39. When cleaning the hutches, what method do you use most often?**

(Check all that apply)

- <sub>1</sub> Scraping
- <sub>2</sub> Water
- <sub>3</sub> Soap and water
- <sub>4</sub> Disinfectant
- <sub>5</sub> Brush-scrubbing
- <sub>6</sub> Power washer
- <sub>7</sub> Other, explain \_\_\_\_\_

**40. After a hutch row is emptied, are those hutches moved to a new area?**

- <sub>1</sub> No
- <sub>2</sub> Yes

**41. What is the minimum length of time that empty hutches remain empty between calves?**

- <sub>1</sub> Less than one week
- <sub>2</sub> One week
- <sub>3</sub> Two weeks
- <sub>4</sub> Three weeks
- <sub>5</sub> Four weeks or greater
- <sub>6</sub> Other, explain \_\_\_\_\_

**42. When pre-weaned calves get sick, do you put them in a separated housing area?**

- <sub>1</sub> No
- <sub>2</sub> Yes

43. Do you use any type of fly control during the year?

- <sub>1</sub> No  
<sub>2</sub> Yes 

44. If yes, what type of fly control do you use?

- <sub>1</sub> Fly traps  
<sub>2</sub> Larvicides  
<sub>3</sub> Fly parasite release programs  
<sub>4</sub> Residual fly sprays  
<sub>5</sub> Insecticide-impregnated ear tags  
<sub>6</sub> Other, explain \_\_\_\_\_

## PERSONNEL TREATMENT PRACTICES

45. Do the same personnel care for the sick calves (feeding or treatments) as care for the healthy calves?

- <sub>1</sub> No  
<sub>2</sub> Yes

46. Do calf treaters change boots or foot covers between sick calf hutches?

- <sub>1</sub> No  
<sub>2</sub> Yes

47. When treating animals do the people treating the animals wear gloves?

- <sub>1</sub> No  
<sub>2</sub> Yes

48. How do the people treating sick calves keep their hands clean while treating?

- <sub>1</sub> Change gloves in-between each calf
- <sub>2</sub> Clean hands/gloved hands with sanitizer between each calf
- <sub>3</sub> Clean hands/gloved hands with sanitizer every \_\_\_\_ number of calves  
(ie: 5 calves then wash hands/gloves)
- <sub>4</sub> Do not wash/sanitize hands/gloved hands during treatment
- <sub>5</sub> Other, explain \_\_\_\_\_

49. When feeding calves electrolytes and or colostrum, do you use esophageal feeders?

- <sub>1</sub> No
- <sub>2</sub> Yes

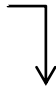

50. If yes, when and how do you clean the esophageal feeders?  
(Check all that apply)

- <sub>1</sub> Clean with soap and water
- <sub>2</sub> Clean with disinfectant
- <sub>3</sub> Clean with water only
- <sub>4</sub> After each calf
- <sub>5</sub> After more than one calf
- <sub>6</sub> Daily
- <sub>7</sub> Weekly
- <sub>8</sub> Other, explain \_\_\_\_\_

51. When treating calves, are syringes re-used between calves?

- <sub>1</sub> No
- <sub>2</sub> Changed after a certain number of calves \_\_\_\_\_
- <sub>3</sub> Changed daily
- <sub>4</sub> Changed weekly
- <sub>5</sub> Other, explain \_\_\_\_\_

**52. When treating calves, are needles re-used between calves?**

- <sub>1</sub> No
- <sub>2</sub> Changed after a certain number of calves \_\_\_\_\_
- <sub>3</sub> Changed daily
- <sub>4</sub> Changed weekly
- <sub>5</sub> Other, explain \_\_\_\_\_

**DAIRY PERSONNEL PRACTICES**

**53. On average how many people are on the dairy each day?**

- <sub>1</sub> Less than 10
- <sub>2</sub> 11 - 25
- <sub>3</sub> 26 - 50
- <sub>4</sub> 51 - 75
- <sub>5</sub> Greater than 75

**54. On average, how many new employees do you hire on a monthly basis?**

- <sub>1</sub> None
- <sub>2</sub> 1 - 2
- <sub>3</sub> 3 - 5
- <sub>4</sub> 6 - 7
- <sub>5</sub> Greater than 8

55. For each group of people listed below please indicated how frequently they visit the farm:

|                                | <b>Frequency</b>                      |                                       |                                       |                                       |                                       |                                       |
|--------------------------------|---------------------------------------|---------------------------------------|---------------------------------------|---------------------------------------|---------------------------------------|---------------------------------------|
|                                | Daily                                 | 2X weekly                             | Monthly                               | 2X Monthly                            | Six Months                            | Yearly                                |
|                                | ▼                                     | ▼                                     | ▼                                     | ▼                                     | ▼                                     | ▼                                     |
| 56. Veterinarian .....         | <input type="checkbox"/> <sub>1</sub> | <input type="checkbox"/> <sub>2</sub> | <input type="checkbox"/> <sub>3</sub> | <input type="checkbox"/> <sub>4</sub> | <input type="checkbox"/> <sub>5</sub> | <input type="checkbox"/> <sub>6</sub> |
| 57. Feed Delivery Trucks ..... | <input type="checkbox"/> <sub>1</sub> | <input type="checkbox"/> <sub>2</sub> | <input type="checkbox"/> <sub>3</sub> | <input type="checkbox"/> <sub>4</sub> | <input type="checkbox"/> <sub>5</sub> | <input type="checkbox"/> <sub>6</sub> |
| 58. Nutritionist .....         | <input type="checkbox"/> <sub>1</sub> | <input type="checkbox"/> <sub>2</sub> | <input type="checkbox"/> <sub>3</sub> | <input type="checkbox"/> <sub>4</sub> | <input type="checkbox"/> <sub>5</sub> | <input type="checkbox"/> <sub>6</sub> |
| 59. Hoof Trimmer .....         | <input type="checkbox"/> <sub>1</sub> | <input type="checkbox"/> <sub>2</sub> | <input type="checkbox"/> <sub>3</sub> | <input type="checkbox"/> <sub>4</sub> | <input type="checkbox"/> <sub>5</sub> | <input type="checkbox"/> <sub>6</sub> |
| 60. Breeders .....             | <input type="checkbox"/> <sub>1</sub> | <input type="checkbox"/> <sub>2</sub> | <input type="checkbox"/> <sub>3</sub> | <input type="checkbox"/> <sub>4</sub> | <input type="checkbox"/> <sub>5</sub> | <input type="checkbox"/> <sub>6</sub> |

61. Do any employees or farm family members work at least once every two weeks on other dairy farms?

<sub>1</sub> No  
<sub>2</sub> Yes 

62. If yes, how many employees work at/own locations with other dairy animals?

<sub>1</sub> None  
<sub>2</sub> 1 - 2  
<sub>3</sub> 3 - 5  
<sub>4</sub> Unknown

**63. If you have any opinions or comments about antibiotic-resistant bacteria on the dairy, please write them in the box below.**

Thank you very much for your time! If you would like to receive summary results from the study, please list the appropriate name and address below:

Name: \_\_\_\_\_

Address: \_\_\_\_\_

City, State, Zip: \_\_\_\_\_
